# Supplementary material for: Activation of Thioglycosides with Copper(II) Bromide
Source: MDPI journal article supplement (doi:10.3390/molecules27217354), 2022-10-29
Supplement: s1 [file s1]

## **Activation of Thioglycosides with Copper(II) Bromide**

Faranak Pooladian,<sup>a</sup> Samira Escopy,<sup>a,b</sup> and Alexei V. Demchenko<sup>a,b\*</sup>

<sup>[a]</sup> Department of Chemistry, Saint Louis University, 3501 Laclede Ave, St. Louis, Missouri 63103, USA;

<sup>[b]</sup> Department of Chemistry and Biochemistry, University of Missouri – St. Louis, One University Boulevard, St. Louis, Missouri 63121, USA

### **Contents:**

|                                                                      |                      |
|----------------------------------------------------------------------|----------------------|
| S1. NMR Monitoring to understand mechanistic aspects of the approach | S2S2. <sup>1</sup> H |
| NMR spectra of known compounds                                       | S4                   |

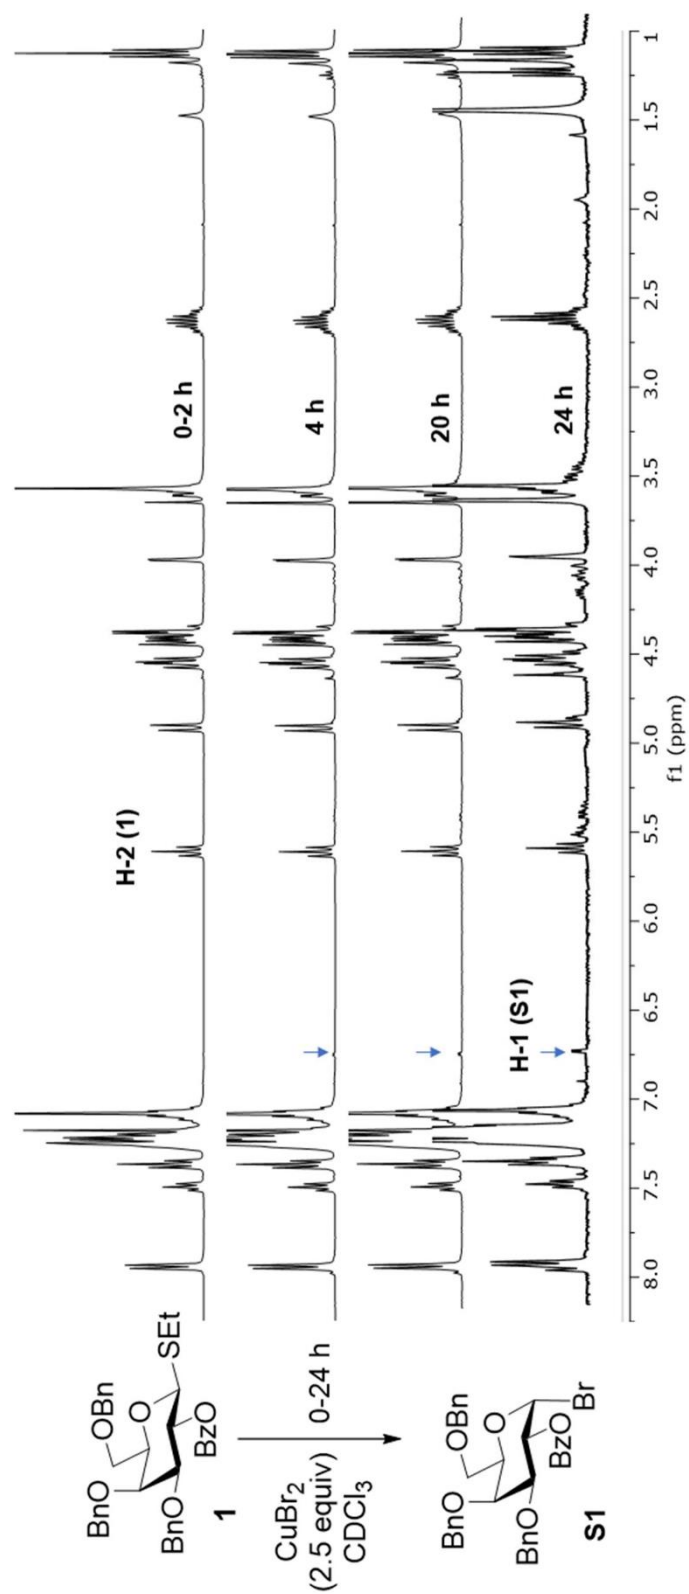

**Figure S1:** NMR Monitoring to Understand Mechanistic Aspects of the Reaction.

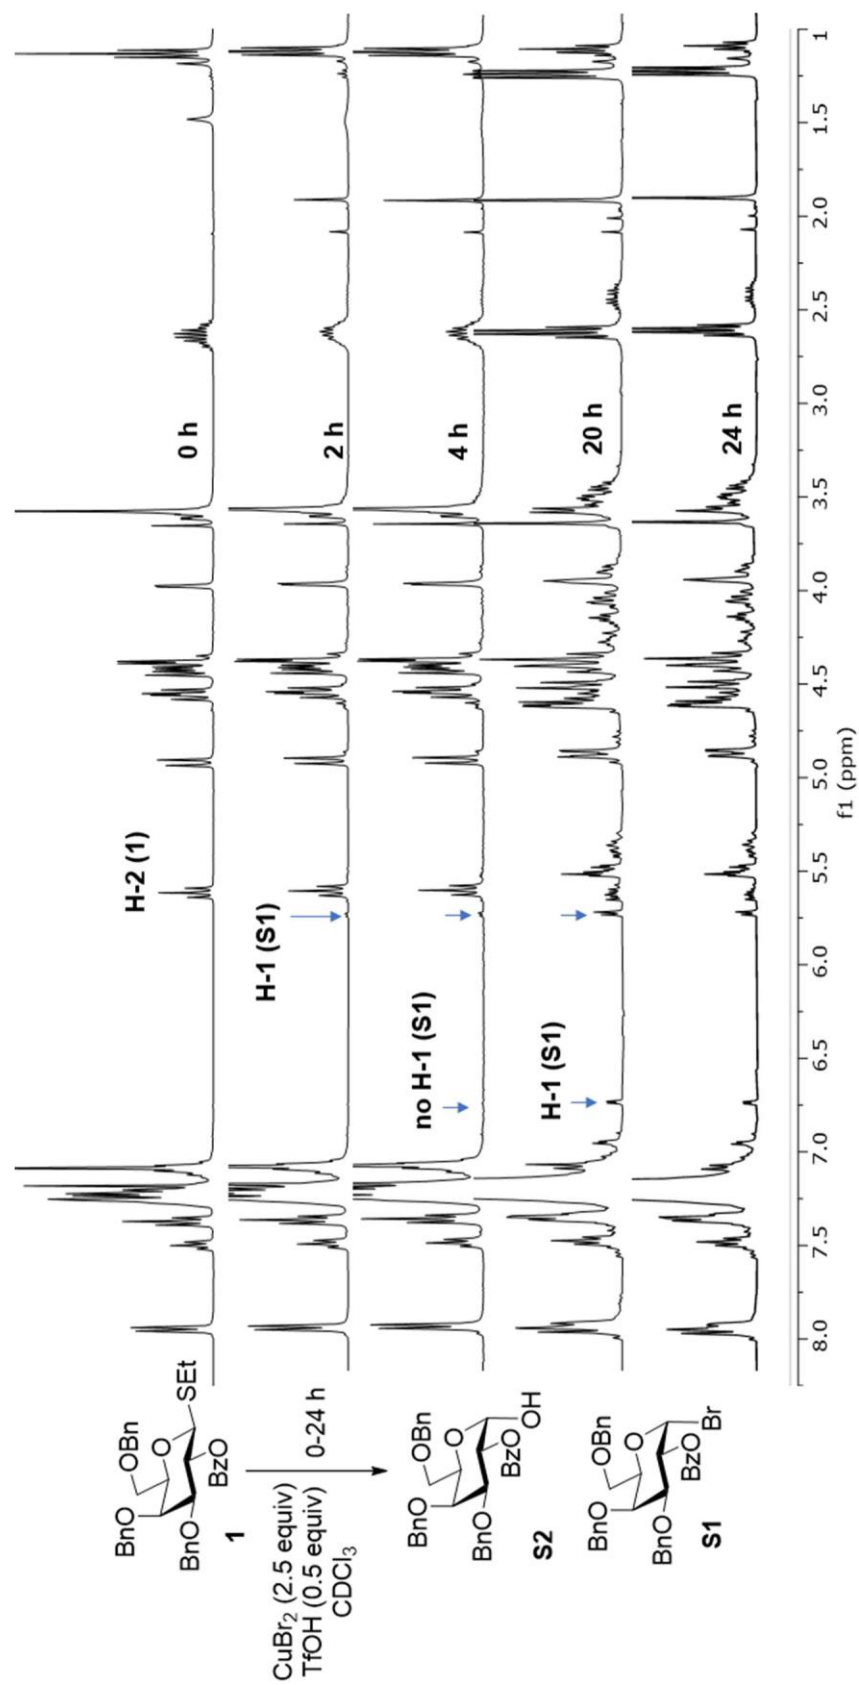

Figure S2:  $^1\text{H}$  NMR Spectra of Known Compounds.  
S3

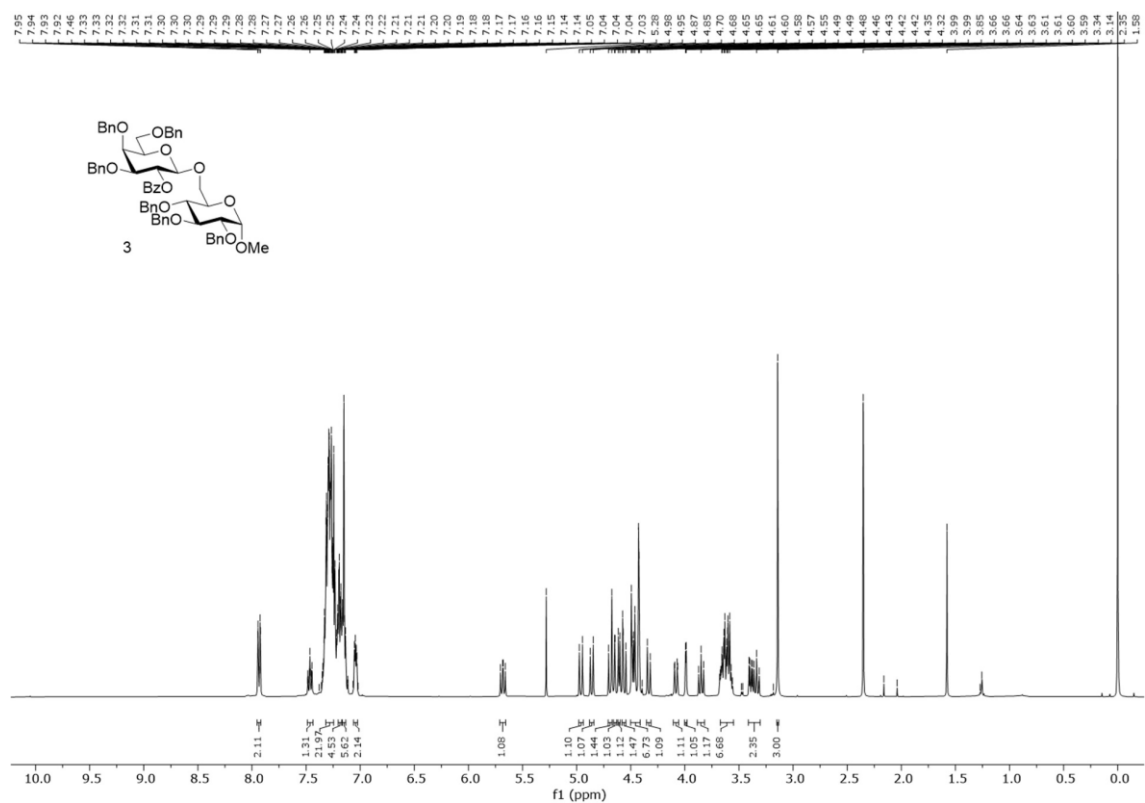

Figure S3: <sup>1</sup>H NMR (CDCl<sub>3</sub> 400 MHz) of compound 3.

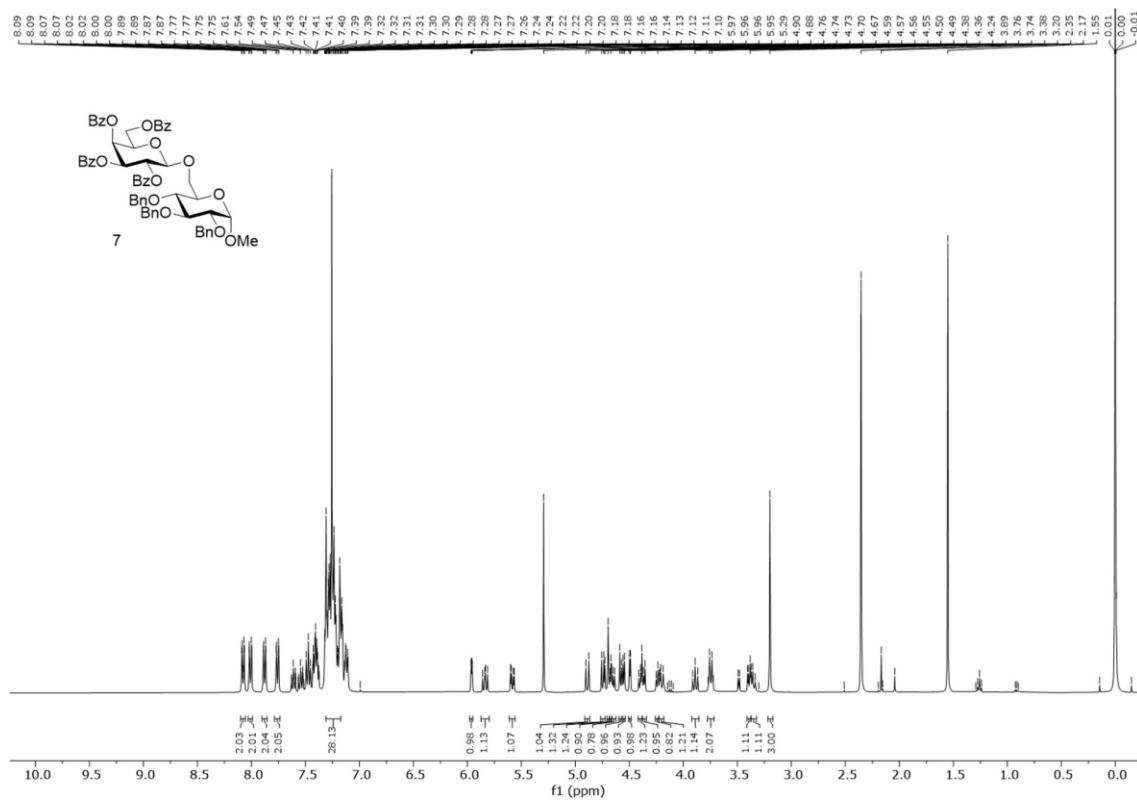

Figure S4: <sup>1</sup>H NMR (CDCl<sub>3</sub> 400 MHz) of compound 7.

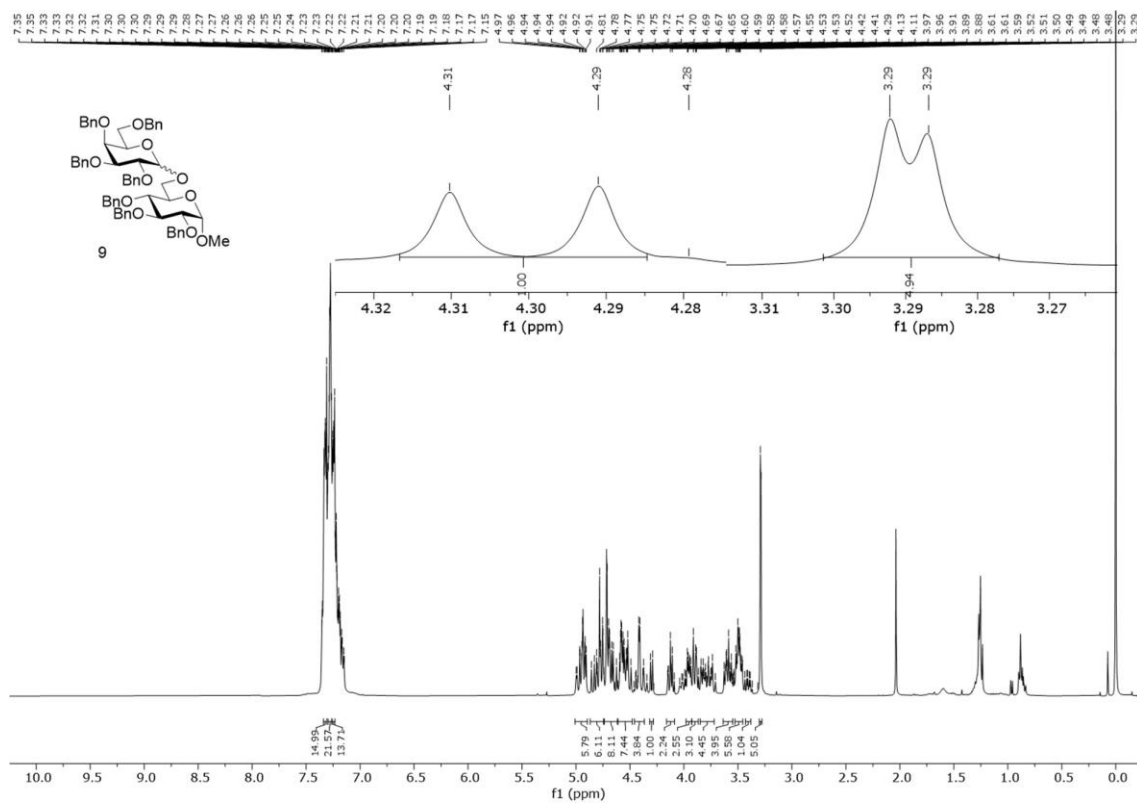

Figure S5: <sup>1</sup>H NMR (CDCl<sub>3</sub> 400 MHz) of compound 9.

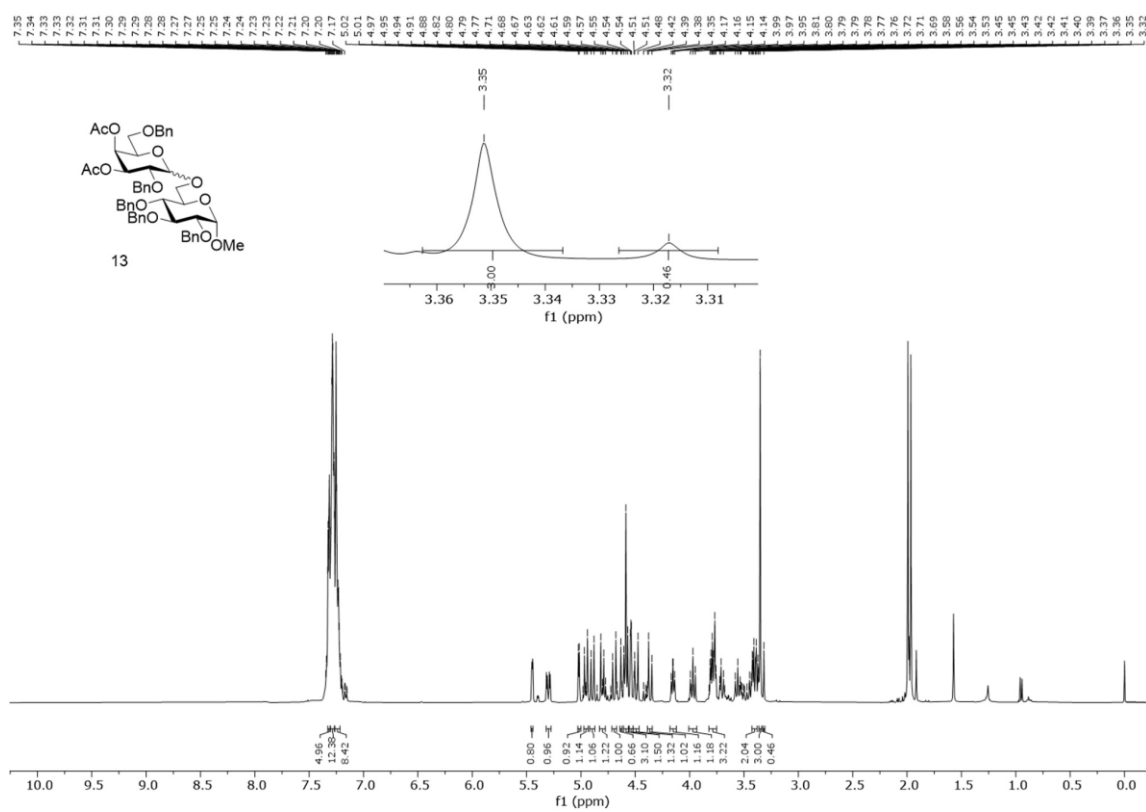

Figure S6: <sup>1</sup>H NMR (CDCl<sub>3</sub> 400 MHz) of compound 13.

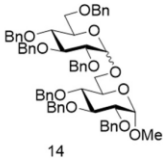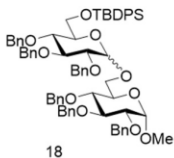

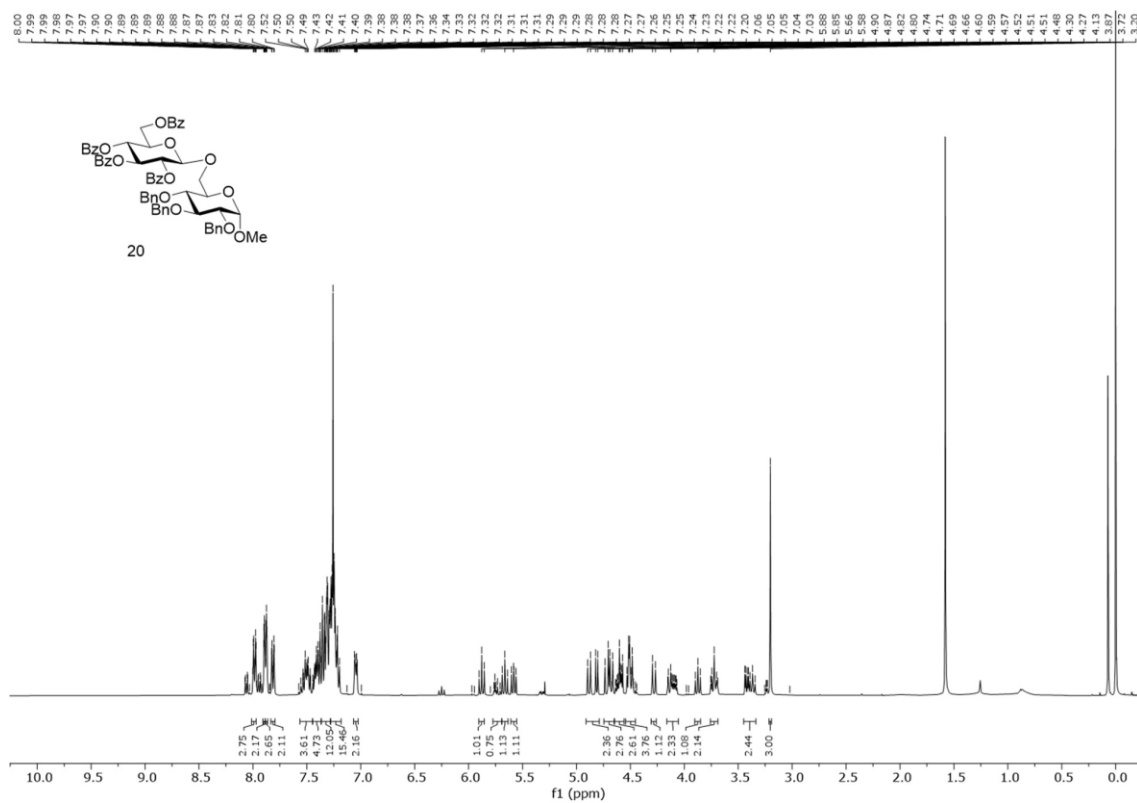

Figure S9:  $^1\text{H}$  NMR ( $\text{CDCl}_3$  400 MHz) of compound 20.

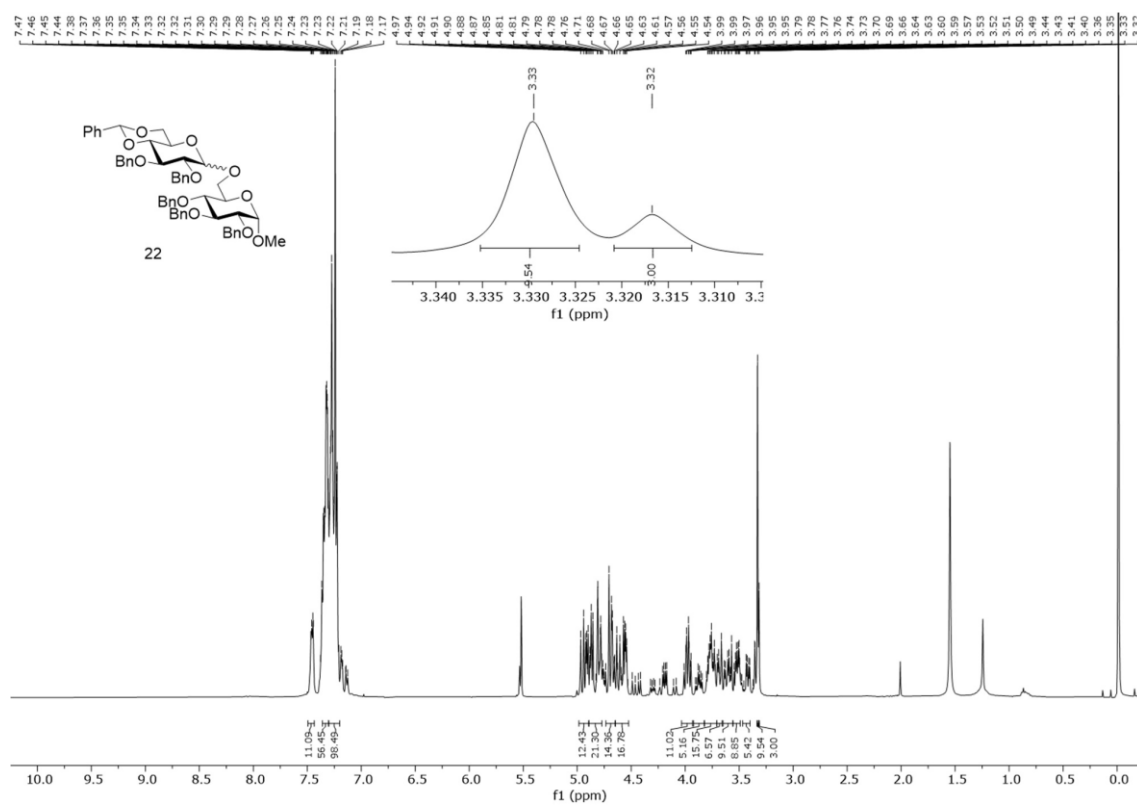

Figure S10:  $^1\text{H}$  NMR ( $\text{CDCl}_3$  400 MHz) of compound 22.





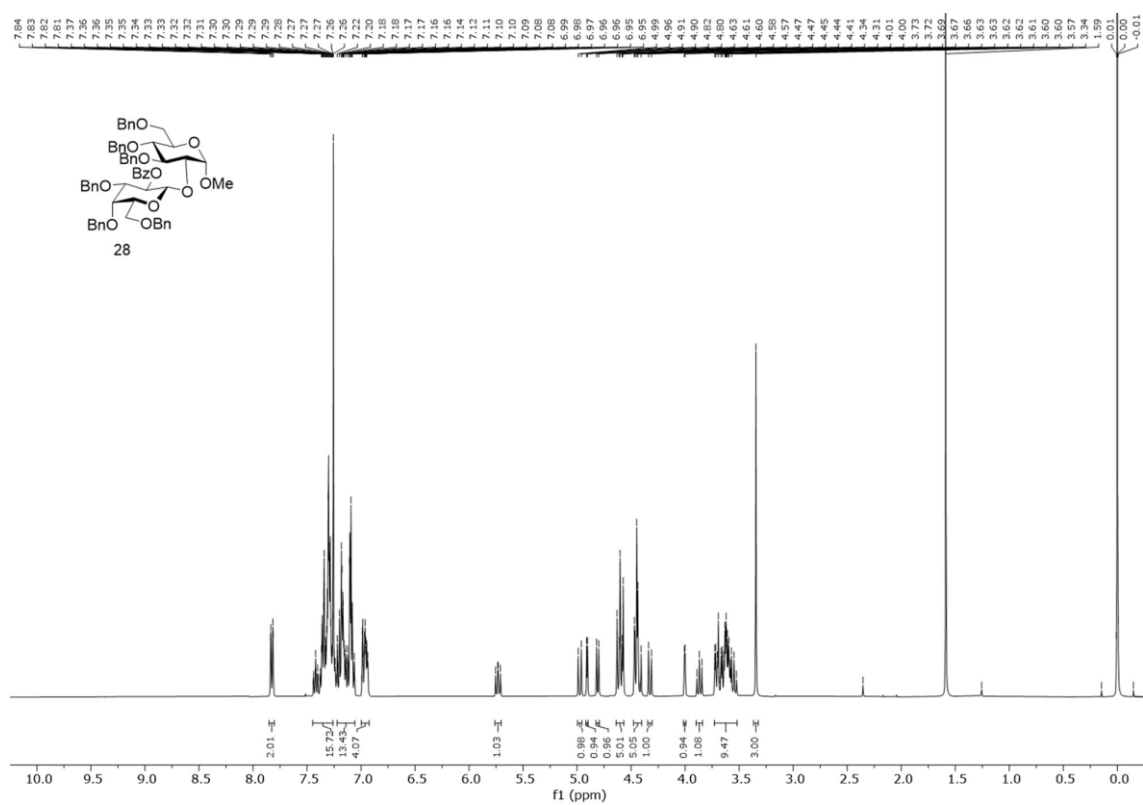

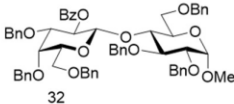[illegible]

**Figure S16:**  $^1\text{H}$  NMR ( $\text{CDCl}_3$  400 MHz) of compound **34**.
